# Supplementary material for: Structure and mechanism of Staphylococcus aureus oleate hydratase (OhyA)
Source: PubMed Central journal article supplement (PMC7948970; doi:10.1074/jbc.ra120.016818), 2021-01-09
Supplement: mmc1.pdf [file mmc1.pdf]

## Supplemental Figures

### Structure and mechanism of *Staphylococcus aureus* oleate hydratase (OhyA)

Christopher D. Radka, Justin L. Batte, Matthew W. Frank, Brandon M. Young, and Charles O. Rock

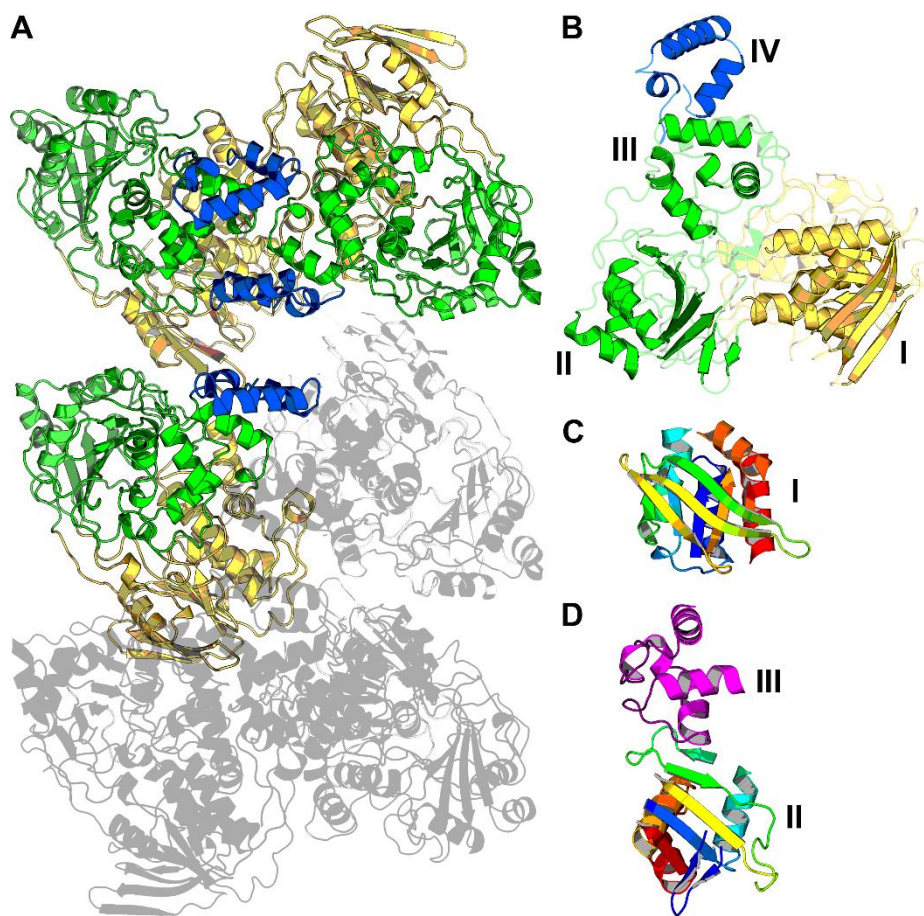

**Supplemental Figure S1. Relationship between OhyA structural and functional domains.** *A*, Protomers in the OhyA asymmetric unit are colored according to their functional domains: FAD lobe, yellow; fatty acid lobe, green; carboxy terminal domain, blue. Crystallographic symmetry related protomers are shown in gray. *B*, OhyA structural domains (I-IV) defined by Volkov et al. (21) shown in solid colors. Structural domain I corresponds to the FAD functional lobe, structural domains II and III create the fatty acid functional lobe and structural domain IV is the carboxy terminus. *C*, The FAD lobe is formed by structural domain I. The Rossmann fold is colored from blue (amino terminus) to red (carboxy terminus). *D*, The fatty acid lobe is constructed from structural domains II (colored from blue (amino terminus) to red (carboxy terminus) and III (purple) that forms an extended Rossmann-like fold consisting of a five-stranded antiparallel  $\beta$ -sheet flanked by three  $\alpha$ -helices on one side, and an  $\alpha$ -helical region on the other side.



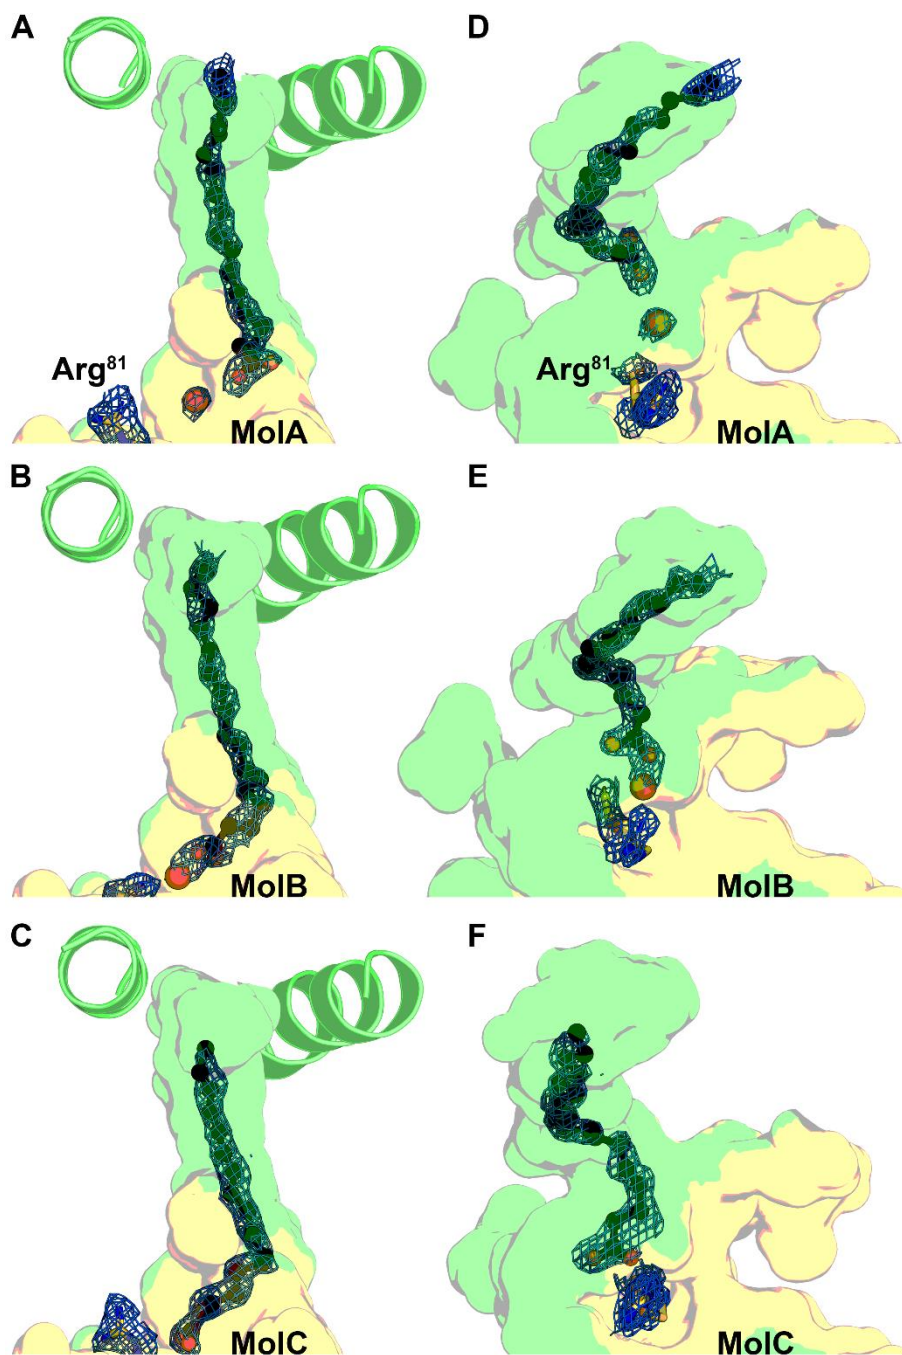

**Supplemental Figure S3. Oleate in the hydrophobic tunnel.** The carboxylate leads oleate (black) down the hydrophobic substrate binding tunnel to Arg81 in OhyA(E82A)•oleate complex (PDB: 7KAY). The electron density for oleate, Arg81, and the water molecule is calculated from a  $2mF_o - DF_c$  map contoured at  $1 \sigma$  (blue mesh). The FAD lobe is yellow, and the fatty acid lobe is green. *A*, Oleate binds OhyA and is separated from Arg81 by a water molecule (red sphere) in PDB: 7KAY, MolA. *B*, Oleate advances in the tunnel and nears Arg81 in PDB: 7KAY, MolB. Arg81 coordinates oleate through the water molecule. *C*, Oleate directly contacts Arg81 and the water molecule is absent in PDB: 7KAY, MolC. *D*, Rotated view of *A*. *E*, Rotated view of *B*. *F*, Rotated view of *C*.

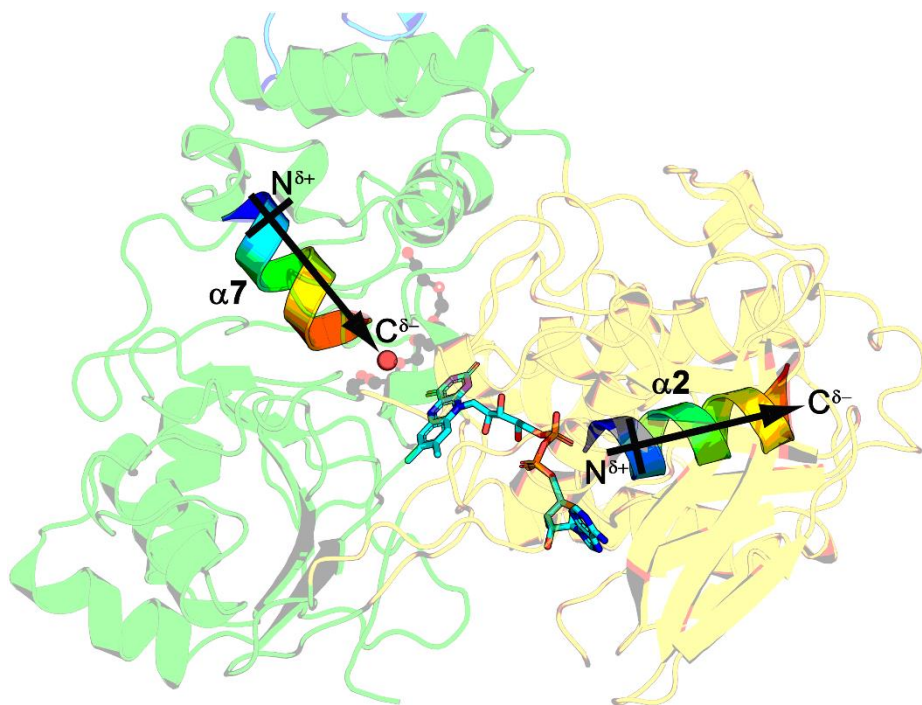

**Supplemental Figure S4. OhyA helix dipoles.** Orientation of helix dipoles in the OhyA•PEG400•FAD complex (PDB: 7KAW, MolC). The  $\alpha 7$  helix dipole stabilizes the active site water substrate and the  $\alpha 2$  helix dipole stabilizes the FAD pyrophosphate. The water substrate is the red sphere, and FAD is cyan, the helix dipoles are colored from blue (amino terminus) to red (carboxy terminus), the FAD lobe is yellow, and fatty acid lobe is green.



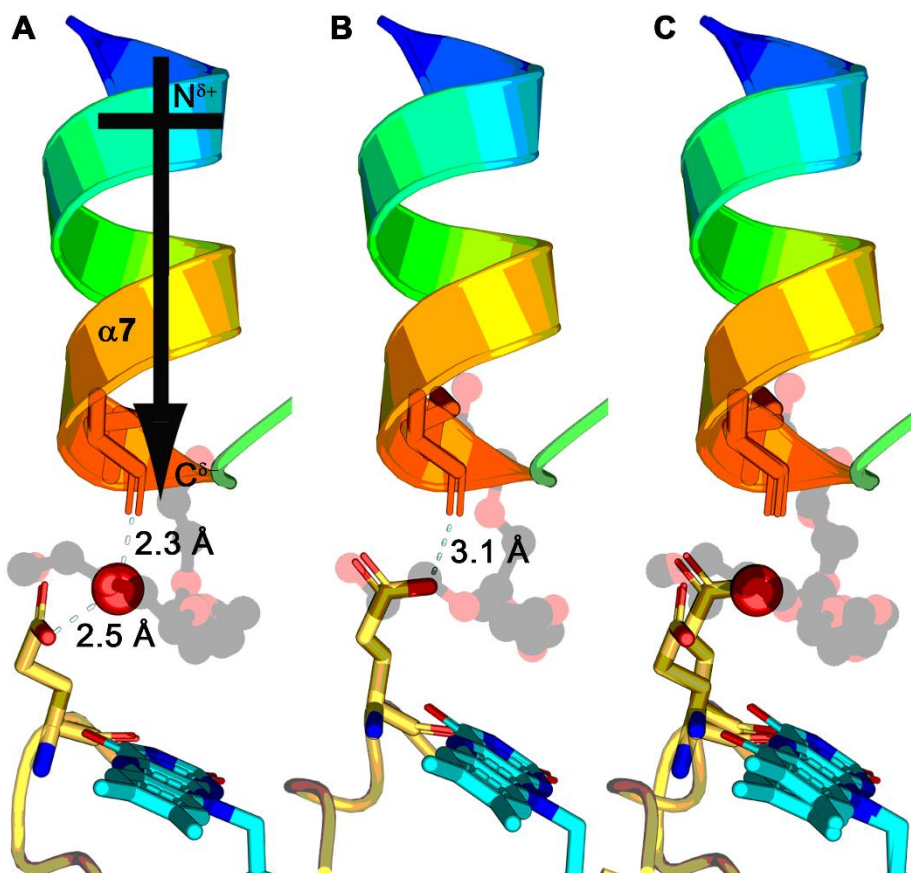

**Supplemental Figure S5. The FAD lid compresses the active site.** Helix  $\alpha 7$  dipole is colored blue (amino terminus) to red (carboxy terminus), FAD is cyan, Glu82 is yellow, water is a red sphere, and PEG400 is black. *A*, The position of the substrate water in OhyA•PEG400•FAD complex with the active site lid in the open conformation (PDB: 7KAW, MoIB). *B*, The OhyA•PEG400•FAD complex with the active site lid in the closed conformation (PDB: 7KAW, MoIC). The substrate water molecule is absent and Glu82 makes a direct hydrogen bond connection with the backbone carbonyl of Met186. *C*, The overlay of Panels A and B illustrates how the active site compresses after the active site lid is closed.

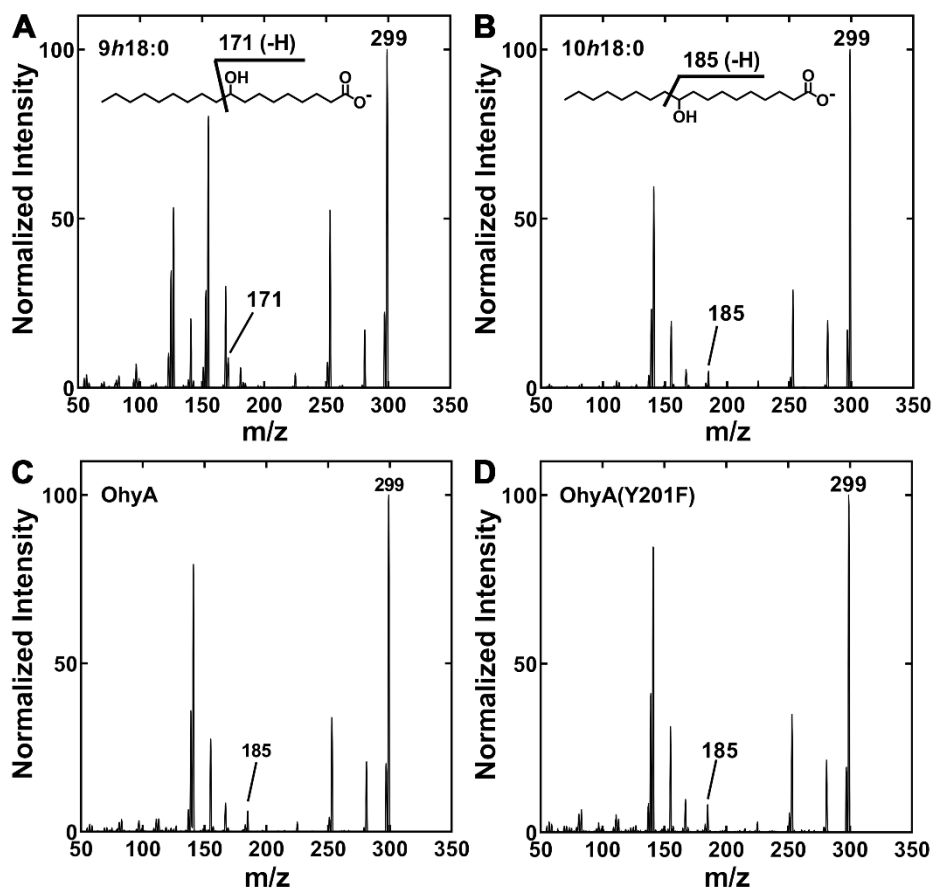

**Supplemental Figure S6. Characterization of OhyA and OhyA(Y201F) regioselectivity.** Fragmentation of hydroxy fatty acids. The molecular ion  $m/z = 299$  corresponds to the hydroxy fatty acid. The fragment  $m/z = 171$  is diagnostic for hydroxylation at carbon-9, and the fragment  $m/z = 185$  is diagnostic for hydroxylation at carbon 10 as indicated by the fragmentation diagrams (*insets*). *A*, Mass spectrum of (*R*)-9-hydroxyoctadecanoic acid. *B*, Mass spectrum of *rac*-10-hydroxyoctadecanoic acid. *C*, Mass spectrum of OhyA *h18:0* reaction product. *D*, Mass spectrum of OhyA(Y201F) *h18:0* reaction product.

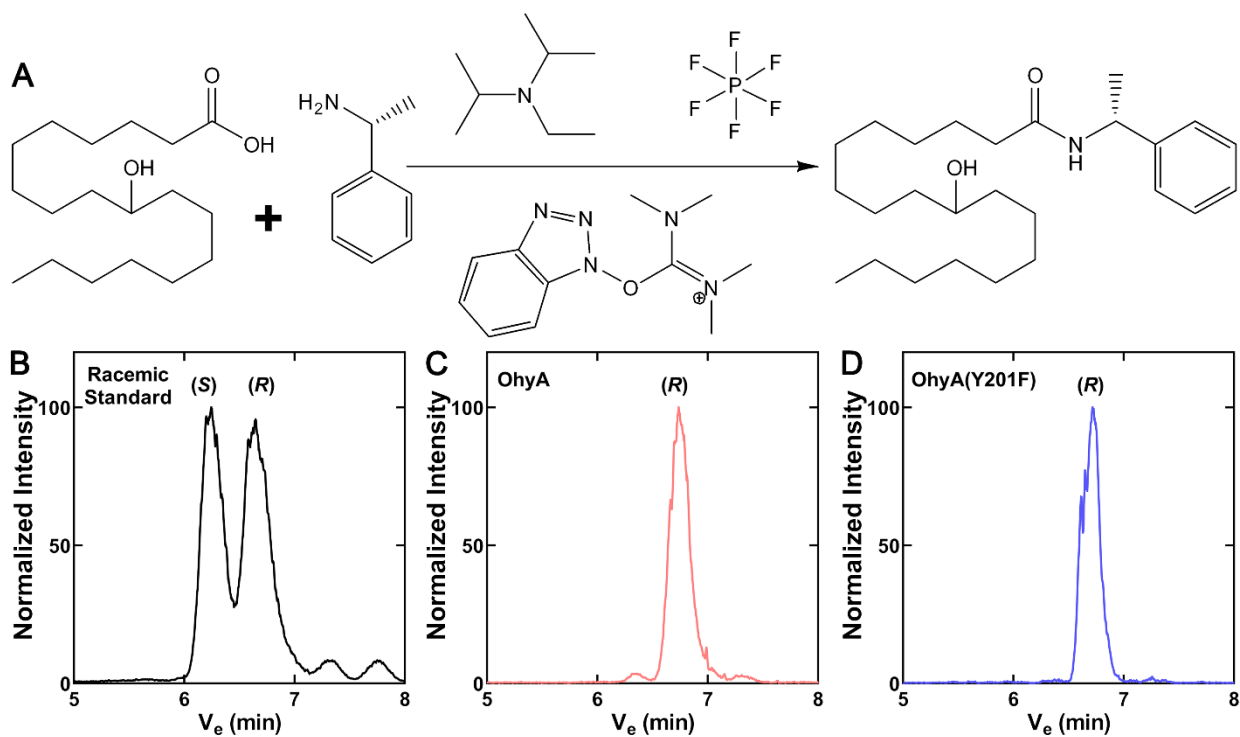

**Supplemental Figure S7. Characterization of OhyA and OhyA(Y201F) enantioselectivity.** *A*, Reaction scheme depicting (*R*)- $\alpha$ -methylbenzylamine-derivatization method. *B*, Chiral chromatography of (*R*)- $\alpha$ -methylbenzylamine-derivatized *rac*-10-hydroxyoctadecanoic acid. *C*, Chiral chromatography of (*R*)- $\alpha$ -methylbenzylamine-derivatized OhyA *h*18:0 reaction product. *D*, Chiral chromatography of (*R*)- $\alpha$ -methylbenzylamine-derivatized OhyA(Y201F) *h*18:0 reaction product.
